# Supplementary material for: Lung Cancer Occurrence—Correlation with Serum Chromium Levels and Genotypes
Source: PubMed Central journal article supplement (PMC7886837; doi:10.1007/s12011-020-02240-6), 2020-07-09
Supplement: 12011_2020_2240_MOESM1_ESM.pdf [file 12011_2020_2240_MOESM1_ESM.pdf]

**Supplementary Material Table1. Serum chromium levels and the occurrence of lung cancer among smokers**

| Quartile | Cr level<br>[µg/L] | Cases | Controls | OR          | CI        | p-value |
|----------|--------------------|-------|----------|-------------|-----------|---------|
| I        | 0.04-0.07          | 18    | 34       | 1.00        | -         | -       |
| II       | 0.08-0.10          | 19    | 33       | 1.17        | 0.47-2.91 | 0.74    |
| III      | 0.11-0.14          | 33    | 18       | <b>3.23</b> | 1.36-7.65 | <0.01   |
| IV       | 0.15-0.95          | 36    | 21       | <b>3.66</b> | 1.50-8.94 | <0.01   |

**Supplementary Material Table2. Serum chromium levels and the occurrence of lung cancer among non-smokers**

| Quartile | Cr level<br>[µg/L] | Cases | Controls | OR          | CI         | p-value |
|----------|--------------------|-------|----------|-------------|------------|---------|
| I        | 0.03-0.06          | 11    | 28       | 1.00        | -          | -       |
| II       | 0.07-0.09          | 20    | 37       | 1.15        | 0.46-2.89  | 0.76    |
| III      | 0.10-0.13          | 39    | 22       | <b>5.06</b> | 1.96-13.02 | <0.01   |
| IV       | 0.14-1.63          | 42    | 25       | <b>5.30</b> | 2.02-13.90 | <0.01   |

**Supplementary Material Table3. Lung cancer occurrence – correlation with serum Cr levels and stages.**

|                         | Quarter | Cr level (µg/L) | Case | Control | OR                | 95%CI      | p-value |
|-------------------------|---------|-----------------|------|---------|-------------------|------------|---------|
| <b>Stage</b>            |         |                 |      |         |                   |            |         |
| Stage I<br>(n=142)      | I       | 0.03-0.07       | 9    | 27      | 1.00              | -          | -       |
|                         | II      | 0.08-0.10       | 10   | 17      | 2.34              | 0.62-8.76  | 0.21    |
|                         | III     | 0.11-0.15       | 30   | 11      | <b>8.72</b>       | 2.56-29.76 | <0.01   |
|                         | IV      | 0.16-1.36       | 22   | 16      | <b>5.15</b>       | 1.49-17.78 | 0.01    |
| Stage II<br>(n=80)      | I       | 0.03-0.07       | 6    | 11      | 1.57              | 0.24-10.35 | 0.64    |
|                         | II      | 0.08-0.09       | 6    | 13      | 1.00              | -          | -       |
|                         | III     | 0.10-0.13       | 15   | 8       | <b>7.85</b>       | 1.25-49.20 | 0.03    |
|                         | IV      | 0.14-0.89       | 13   | 8       | <b>5.49</b>       | 0.98-30.83 | 0.05    |
| Stage III<br>(n=170)    | I       | 0.03-0.06       | 10   | 21      | 1.00              | -          | -       |
|                         | II      | 0.07-0.09       | 22   | 27      | 1.71              | 0.69-4.27  | 0.25    |
|                         | III     | 0.10-0.13       | 25   | 21      | <b>2.75</b>       | 1.03-7.30  | 0.04    |
|                         | IV      | 0.14-0.71       | 28   | 16      | <b>4.11</b>       | 1.45-11.65 | <0.01   |
| Stage IV<br>(n=30)      | I       | 0.04-0.07       | 1    | 4       | 1.00              | -          | -       |
|                         | II      | 0.08-0.10       | 2    | 6       | 1.00              | 0.06-15.99 | 1.00    |
|                         | III     | 0.11-0.13       | 6    | 2       | 1365934879.4<br>3 | 0.00-Inf   | 1.00    |
|                         | IV      | 0.14-1.63       | 6    | 3       | 2731869758.8<br>7 | 0.00-Inf   | 1.00    |
| Stage I-II<br>(n=222)   | I       | 0.03-0.07       | 15   | 38      | 1.00              | -          | -       |
|                         | II      | 0.08-0.10       | 21   | 33      | 1.91              | 0.70-5.17  | 0.21    |
|                         | III     | 0.11-0.14       | 37   | 16      | <b>6.01</b>       | 2.32-15.54 | <0.01   |
|                         | IV      | 0.15-1.36       | 38   | 24      | <b>5.07</b>       | 1.95-13.19 | <0.01   |
| Stage III-IV<br>(n=200) | I       | 0.03-0.06       | 11   | 24      | 1.00              | -          | -       |
|                         | II      | 0.07-0.09       | 24   | 32      | 1.61              | 0.67-3.86  | 0.29    |
|                         | III     | 0.10-0.13       | 31   | 25      | <b>3.05</b>       | 1.22-7.63  | 0.02    |
|                         | IV      | 0.14-1.63       | 34   | 19      | <b>4.68</b>       | 1.73-12.68 | <0.01   |

**Supplementary Material Table4. Lung cancer occurrence – correlation with serum Cr levels and genotypes.**

|                                  | Quarter | Cr level (µg/L) | Case | Control | OR          | 95%CI      | p-value |
|----------------------------------|---------|-----------------|------|---------|-------------|------------|---------|
| Genotype                         |         |                 |      |         |             |            |         |
| <i>CAT</i> CC<br>(n=164)         | I       | 0.04-0.07       | 13   | 23      | 1.00        | -          | -       |
|                                  | II      | 0.08-0.09       | 12   | 21      | 0.97        | 0.34-2.72  | 0.95    |
|                                  | III     | 0.10-0.13       | 28   | 19      | <b>2.89</b> | 1.10-7.60  | 0.03    |
|                                  | IV      | 0.14-1.36       | 29   | 19      | <b>2.83</b> | 1.10-7.27  | 0.03    |
| <i>CAT</i> nonCC<br>(n=88)       | I       | 0.04-0.07       | 5    | 16      | 1.00        | -          | -       |
|                                  | II      | 0.08-0.10       | 10   | 12      | 2.93        | 0.48-17.91 | 0.24    |
|                                  | III     | 0.11-0.14       | 13   | 8       | <b>8.11</b> | 1.36-48.52 | 0.02    |
|                                  | IV      | 0.15-0.89       | 16   | 8       | <b>9.18</b> | 1.64-51.24 | 0.01    |
| <i>NQO1</i> GG<br>(n=228)        | I       | 0.03-0.07       | 20   | 33      | 1.04        | 0.45-2.38  | 0.94    |
|                                  | II      | 0.08-0.10       | 21   | 40      | 1.00        | -          | -       |
|                                  | III     | 0.11-0.14       | 36   | 20      | <b>2.90</b> | 1.38-6.08  | <0.01   |
|                                  | IV      | 0.15-1.63       | 37   | 21      | <b>3.68</b> | 1.60-8.49  | <0.01   |
| <i>NQO1</i><br>nonGG<br>(n=34)   | I       | 0.04-0.06       | 2    | 4       | 0.75        | 0.05-10.40 | 0.83    |
|                                  | II      | 0.07-0.09       | 2    | 6       | 1.00        | -          | -       |
|                                  | III     | 0.11-0.14       | 6    | 4       | 2.54        | 0.32-19.93 | 0.37    |
|                                  | IV      | 0.15-0.95       | 7    | 3       | 5.86        | 0.59-58.40 | 0.13    |
| <i>MT1B</i> GG<br>(n=50)         | I       | 0.06-0.08       | 6    | 7       | 1.55        | 0.34-7.07  | 0.57    |
|                                  | II      | 0.09-0.11       | 3    | 6       | 1.00        | -          | -       |
|                                  | III     | 0.12-0.16       | 7    | 6       | 2.58        | 0.46-14.63 | 0.28    |
|                                  | IV      | 0.17-0.75       | 9    | 6       | 4.00        | 0.57-28.26 | 0.16    |
| <i>MT1B</i><br>nonGG<br>(n=176)  | I       | 0.03-0.06       | 8    | 24      | 1.00        | -          | -       |
|                                  | II      | 0.07-0.09       | 20   | 30      | 2.31        | 0.77-6.93  | 0.14    |
|                                  | III     | 0.10-0.14       | 29   | 20      | <b>4.76</b> | 1.60-14.12 | <0.01   |
|                                  | IV      | 0.15-1.36       | 31   | 14      | <b>7.23</b> | 2.28-22.93 | <0.01   |
| <i>CRTC3</i> GG<br>(n=128)       | I       | 0.03-0.07       | 13   | 16      | 2.43        | 0.73-8.12  | 0.15    |
|                                  | II      | 0.08-0.10       | 10   | 25      | 1.00        | -          | -       |
|                                  | III     | 0.11-0.14       | 21   | 9       | <b>5.44</b> | 1.71-17.31 | <0.01   |
|                                  | IV      | 0.15-0.68       | 20   | 14      | <b>3.91</b> | 1.22-12.54 | 0.02    |
| <i>CRTC3</i><br>nonGG<br>(n=106) | I       | 0.04-0.07       | 12   | 15      | 2.23        | 0.39-12.70 | 0.37    |
|                                  | II      | 0.08-0.09       | 6    | 13      | 1.00        | -          | -       |
|                                  | III     | 0.10-0.13       | 17   | 16      | 4.74        | 0.88-25.53 | 0.07    |
|                                  | IV      | 0.14-0.89       | 18   | 9       | <b>9.73</b> | 1.58-60.10 | 0.01    |
| <i>GPXI</i> CC<br>(n=110)        | I       | 0.03-0.07       | 9    | 19      | 1.00        | -          | -       |
|                                  | II      | 0.08-0.10       | 8    | 11      | 1.32        | 0.35-5.02  | 0.68    |
|                                  | III     | 0.11-0.14       | 17   | 14      | 2.64        | 0.92-7.53  | 0.07    |
|                                  | IV      | 0.15-0.75       | 21   | 11      | <b>4.23</b> | 1.34-13.34 | 0.01    |
| <i>GPXI</i><br>nonCC<br>(n=122)  | I       | 0.04-0.06       | 6    | 15      | 1.00        | -          | -       |
|                                  | II      | 0.07-0.09       | 11   | 23      | 1.30        | 0.41-4.13  | 0.66    |
|                                  | III     | 0.10-0.14       | 22   | 12      | <b>5.75</b> | 1.45-22.76 | 0.01    |
|                                  | IV      | 0.15-1.63       | 22   | 11      | <b>6.72</b> | 1.65-27.38 | <0.01   |
| <i>SOD2</i> GG                   | I       | 0.04-0.08       | 4    | 4       | 1.85        | 0.16-21.67 | 0.62    |

|                                  |     |           |    |    |              |             |       |
|----------------------------------|-----|-----------|----|----|--------------|-------------|-------|
| (n=30)                           | II  | 0.09-0.10 | 1  | 2  | 1.00         | -           | -     |
|                                  | III | 0.11-0.17 | 6  | 5  | 2.35         | 0.16-33.69  | 0.53  |
|                                  | IV  | 0.18-1.63 | 4  | 4  | 2.09         | 0.09-47.20  | 0.64  |
| <i>SOD2</i><br>nonGG<br>(n=220)  | I   | 0.03-0.07 | 15 | 36 | 1.00         | -           | -     |
|                                  | II  | 0.08-0.10 | 20 | 37 | 1.45         | 0.57-3.69   | 0.44  |
|                                  | III | 0.11-0.14 | 37 | 17 | <b>5.79</b>  | 2.23-15.05  | <0.01 |
|                                  | IV  | 0.15-1.36 | 38 | 20 | <b>6.06</b>  | 2.22-16.51  | <0.01 |
| <i>XRCC1</i> CC<br>(n=336)       | I   | 0.04-0.07 | 28 | 53 | 1.35         | 0.58-3.15   | 0.49  |
|                                  | II  | 0.08-0.09 | 20 | 44 | 1.00         | -           | -     |
|                                  | III | 0.10-0.13 | 58 | 35 | <b>4.49</b>  | 2.00-10.12  | <0.01 |
|                                  | IV  | 0.14-0.95 | 62 | 36 | <b>4.82</b>  | 2.16-10.72  | <0.01 |
| <i>ERCC2</i> TT<br>(n=52)        | I   | 0.03-0.06 | 5  | 8  | 1.28         | 0.22-7.29   | 0.78  |
|                                  | II  | 0.07-0.09 | 4  | 9  | 1.00         | -           | -     |
|                                  | III | 0.10-0.11 | 6  | 5  | 2.43         | 0.50-11.84  | 0.27  |
|                                  | IV  | 0.12-0.75 | 11 | 4  | <b>12.34</b> | 1.17-130.01 | 0.04  |
| <i>ERCC2</i><br>nonTT<br>(n=194) | I   | 0.03-0.07 | 12 | 23 | 1.00         | -           | -     |
|                                  | II  | 0.08-0.10 | 21 | 30 | 1.42         | 0.54-3.74   | 0.48  |
|                                  | III | 0.11-0.14 | 34 | 21 | <b>3.01</b>  | 1.21-7.51   | 0.02  |
|                                  | IV  | 0.15-1.63 | 30 | 23 | <b>2.75</b>  | 1.03-7.34   | 0.04  |
| <i>ABCBI</i> CC<br>(n=48)        | I   | 0.03-0.06 | 3  | 6  | 1.00         | -           | -     |
|                                  | II  | 0.07-0.09 | 6  | 8  | 1.73         | 0.28-10.71  | 0.56  |
|                                  | III | 0.10-0.12 | 5  | 6  | 2.54         | 0.36-17.94  | 0.35  |
|                                  | IV  | 0.13-0.62 | 10 | 4  | 4.96         | 0.71-34.57  | 0.11  |
| <i>ABCBI</i><br>nonCC<br>(n=202) | I   | 0.03-0.06 | 14 | 23 | 1.10         | 0.45-2.69   | 0.84  |
|                                  | II  | 0.07-0.09 | 18 | 35 | 1.00         | -           | -     |
|                                  | III | 0.10-0.14 | 37 | 24 | <b>4.15</b>  | 1.68-10.25  | <0.01 |
|                                  | IV  | 0.15-1.63 | 32 | 19 | <b>4.81</b>  | 1.83-12.64  | <0.01 |
| <i>GSTP1</i> AA<br>(n=90)        | I   | 0.03-0.07 | 10 | 10 | 3.25         | 0.78-13.57  | 0.11  |
|                                  | II  | 0.08-0.09 | 5  | 15 | 1.00         | -           | -     |
|                                  | III | 0.10-0.13 | 18 | 9  | <b>8.85</b>  | 1.72-45.57  | <0.01 |
|                                  | IV  | 0.14-1.63 | 12 | 11 | 3.12         | 0.73-13.43  | 0.13  |
| <i>GSTP1</i><br>nonAA<br>(n=132) | I   | 0.03-0.07 | 9  | 22 | 1.00         | -           | -     |
|                                  | II  | 0.08-0.10 | 16 | 17 | 3.58         | 0.92-13.84  | 0.07  |
|                                  | III | 0.11-0.14 | 20 | 13 | <b>6.61</b>  | 1.69-25.75  | <0.01 |
|                                  | IV  | 0.15-0.75 | 21 | 14 | <b>9.47</b>  | 2.06-43.49  | <0.01 |

**Supplementary Material Table5. Frequency of genotype prevalence (%) in subjects under observation\*.**

| Genotype                       | Number of cases with genotype/ all cases | Frequency in cases | Number of controls with genotype/ all controls | Frequency in controls | OR   | 95%CI     | P-value |
|--------------------------------|------------------------------------------|--------------------|------------------------------------------------|-----------------------|------|-----------|---------|
| <i>CAT</i> -rs1001179 CC       | 123/218                                  | 56.42              | 133/218                                        | 61.01                 | 1.21 | 0.81-1.80 | 0.38    |
| <i>CAT</i> -rs1001179 nonCC    | 95/218                                   | 43.58              | 85/218                                         | 38.99                 |      |           |         |
| <i>NQO1</i> -rs1800566 GG      | 158/218                                  | 72.48              | 157/218                                        | 72.02                 | 0.98 | 0.63-1.52 | 1.00    |
| <i>NQO1</i> -rs1800566 nonGG   | 60/218                                   | 27.52              | 61/218                                         | 27.98                 |      |           |         |
| <i>MT1B</i> -rs7191779 GG      | 82/218                                   | 37.61              | 73/218                                         | 33.49                 | 0.84 | 0.55-1.26 | 0.42    |
| <i>MT1B</i> -rs7191779 nonGG   | 136/218                                  | 62.39              | 145/218                                        | 66.51                 |      |           |         |
| <i>CRTC3</i> -rs12915189 GG    | 115/218                                  | 52.75              | 114/218                                        | 52.29                 | 0.98 | 0.66-1.46 | 1.00    |
| <i>CRTC3</i> -rs12915189 nonGG | 103/218                                  | 47.25              | 104/218                                        | 47.71                 |      |           |         |
| <i>GPX1</i> -rs1050450 CC      | 105/218                                  | 48.17              | 107/218                                        | 49.08                 | 1.04 | 0.70-1.54 | 0.92    |
| <i>GPX1</i> -rs1050450 nonCC   | 113/218                                  | 51.83              | 111/218                                        | 50.92                 |      |           |         |
| <i>SOD2</i> -rs4880 GG         | 64/218                                   | 29.36              | 59/218                                         | 27.06                 | 0.89 | 0.57-1.39 | 0.67    |
| <i>SOD2</i> -rs4880 nonGG      | 154/218                                  | 70.64              | 159/218                                        | 72.94                 |      |           |         |
| <i>XRCC1</i> -rs17997822 CC    | 198/218                                  | 90.83              | 186/218                                        | 85.32                 | 0.59 | 0.31-1.10 | 0.10    |
| <i>XRCC1</i> -rs1799782 nonCC  | 20/218                                   | 9.17               | 32/218                                         | 14.68                 |      |           |         |
| <i>ERCC2</i> -rsrs13181 TT     | 68/218                                   | 31.19              | 79/218                                         | 36.24                 | 0.80 | 0.52-1.21 | 0.31    |
| <i>ERCC2</i> -rs13181 nonTT    | 150/218                                  | 68.81              | 139/218                                        | 63.76                 |      |           |         |
| <i>ABCB1</i> -rs2032582 CC     | 73/218                                   | 33.49              | 68/218                                         | 31.19                 | 0.90 | 0.59-1.37 | 0.68    |
| <i>ABCB1</i> -rs2032582 nonCC  | 145/218                                  | 66.51              | 150/218                                        | 68.81                 |      |           |         |
| <i>GSTP1</i> -rs1695 AA        | 99/218                                   | 45.41              | 98/218                                         | 44.95                 | 0.98 | 0.66-1.45 | 1.00    |
| <i>GSTP1</i> -rs1695 nonAA     | 119/218                                  | 54.59              | 120/218                                        | 55.05                 |      |           |         |

\*No significant differences between cases and controls
